# Supplementary material for: Bioinformatics-Based Characterization of Key Biomarkers and Immune Infiltration in Coronary Artery Disease
Source: Research Square preprint supplement (doi:10.21203/rs.3.rs-1298849/v1), 2022-03-02
Supplement: Supplementary file 1 [file d8139a11d46cce96197b3d56.csv]

	logFC	AveExpr	t	P.Value	adj.P.Val	B
DGCR11	1.36644769813519	6.89698871527778	7.39294799188017	9.25456235452625e-08	0.00211670350172724	7.12345635607024
LOC440300	-1.23176427738928	4.82432465277778	-5.5819301776748	8.16947154454296e-06	0.0581074399061631	3.43463288842643
LOC100131231	1.20238971445221	5.86037586805555	5.49689090889992	1.01621965558173e-05	0.0581074399061631	3.25018387003858
CXorf36	-1.27192263986015	5.3856328125	-5.39712174533626	1.31362633533055e-05	0.0600905230833608	3.03280808264195
EGR3	4.4364782925408	5.78084809027778	5.25951680371375	1.87355149692692e-05	0.0714197830628544	2.73139263631125
LOC283761	-1.23955783799534	5.11443836805556	-5.16908435936715	2.36721795882418e-05	0.0753420725544276	2.5323822088768
SGK1	1.00751442307694	13.0056328125	5.12765769128556	2.63525962065154e-05	0.0753420725544276	2.44099246711312
FGF5	-1.37552243589744	4.02646701388889	-4.99559078587416	3.71135690325114e-05	0.0778734704374846	2.14879576070656
GSDMA	-1.00724810606061	4.57284288194444	-4.93911184978136	4.29740118537608e-05	0.0778734704374846	2.02348070933247
EIF5	1.10469318181818	9.04286979166667	4.88348816499833	4.9653571350713e-05	0.0778734704374846	1.8998800055429
MAP7	1.20342147435897	7.63181163194445	4.79898631175588	6.1847555688844e-05	0.0778734704374846	1.71180197537904
C1orf88	1.0001418997669	5.53927951388889	4.60194849525327	0.000103233811708807	0.0778734704374846	1.27215513160993
EYA3	1.2973613053613	4.64761805555556	4.58910455207432	0.000106739558085373	0.0778734704374846	1.24345897428689
NACC2	1.02607837995338	11.2004288194444	4.56094960003475	0.000114846005551157	0.0778734704374846	1.18054417645118
C15orf37	1.17681614219114	6.64015798611111	4.55617049517227	0.000116281801063843	0.0778734704374846	1.16986355039088
IRS2	1.08221182983681	11.9853003472222	4.55315290732866	0.000117197595515615	0.0778734704374846	1.16311949309722
LOC148987	1.11449825174825	2.96919791666667	4.42610183335489	0.000163043289438845	0.0836921271768317	0.879097682947546
ANXA13	-1.123018502331	3.07230815972222	-4.3782090257579	0.000184633083927365	0.0857688281528547	0.772029928272182
ZNF597	1.13453962703963	3.26865972222222	4.2358500409044	0.000267071220086702	0.102950888223157	0.453965834837272
SFN	1.42352025058275	8.57334809027778	4.23258599943336	0.000269338410203535	0.102950888223157	0.446678761290426
LOC286058	3.51103613053613	5.02957638888889	4.10397669384739	0.000375614491244396	0.122729352053455	0.159872386996176
KLHL15	1.45801252913753	3.49073784722222	4.06547469009751	0.000414853793535132	0.122943026351348	0.0741604053549025
KIF13A	1.08690501165501	7.28937847222222	4.05993265361926	0.000420826137023204	0.122943026351348	0.0618297223981576
TRIB1	1.04709644522145	13.9046961805556	4.04259601312795	0.000440063166280334	0.123095973971322	0.0232685618731763
FAM105B	1.24125029137529	8.24034201388889	4.02772641775486	0.000457253367711518	0.124503559836879	-0.00979052796533608
CXCL1	1.68277928321678	13.1044505208333	4.00857046241078	0.000480379885735595	0.124855099392551	-0.0523583518012316
SPTBN1	1.17121022727272	5.69921614583333	3.97242252220755	0.000527210484583617	0.125911965341565	-0.132616883794515
ACPP	1.13814131701631	8.73130381944444	3.94538720867589	0.000565153854553535	0.129152875910358	-0.192580313365839
LOC100133839	1.0679678030303	4.83138975694444	3.93044421981714	0.000587268792130418	0.129152875910358	-0.225698969875787
LOC727916	1.08833304195804	3.07468229166667	3.92426601080914	0.000596659585932215	0.129152875910358	-0.239386683933978
ZC3H12D	1.06425772144522	4.97601649305556	3.8988405395116	0.000636888571054965	0.129152875910358	-0.295682853552294
BQ706149	1.3174122960373	7.99160590277778	3.88789136126997	0.000655025078943756	0.129152875910358	-0.319909009597773
RPS12	-1.12323368298371	15.0484340277778	-3.8385495844835	0.000743268258342222	0.132812746912526	-0.428946987376005
BTBD19	-1.18255623543124	3.57400173611111	-3.81614519294487	0.000787102022851332	0.135015876120919	-0.478379959777493
LOC100127972	1.36313199300699	3.14821354166667	3.81105517410226	0.000797409411238315	0.135015876120919	-0.489603486841229
STK35	1.15391564685315	5.6930546875	3.77603230288174	0.000872016777936078	0.136522253979257	-0.566755390443818
LOC100129363	1.10438111888112	3.94997916666667	3.7725231554711	0.000879859624490049	0.136522253979257	-0.574478405651448
IL8	2.89128117715618	10.3017413194444	3.75719549213135	0.00091493613687634	0.138419797084738	-0.608195833516679
NR4A2	1.28447202797203	6.881125	3.66266300920595	0.00116363157390572	0.148420869376771	-0.815530222709246
RIPK4	1.63280812937063	4.63471614583333	3.65795110643673	0.00117762525720492	0.148420869376771	-0.825835156369563
LOC100132701	1.07294900932401	3.26282465277778	3.6568117944404	0.00118103350063712	0.148420869376771	-0.828326389425901
LOC100129322	1.48748819930069	9.67687239583333	3.64328511817757	0.00122224342521544	0.14988143163831	-0.857890671303902
PDZD3	1.21687907925408	4.47092881944444	3.63582262389065	0.00124557710440495	0.14988143163831	-0.874190282773396
MS4A3	1.65463490675991	6.77132118055555	3.62619777564626	0.00127631617603798	0.150378535403913	-0.895201589813176
PRRT4	1.27013432400932	6.55919965277778	3.60924506386278	0.00133227173124082	0.150378535403913	-0.932178268045631
GALR3	1.43712703962703	14.2510138888889	3.60421062774572	0.00134934565133604	0.150378535403913	-0.943151336366634
EGR2	2.3564037004662	8.35498003472222	3.602544427329	0.00135504339619995	0.150378535403913	-0.9467821874391
TP53INP2	1.3527247960373	6.28579600694444	3.60076764088948	0.00136114519977269	0.150378535403913	-0.950653576910258
RAX2	-1.16835722610723	4.05925347222222	-3.59866960565477	0.00136838479757253	0.150378535403913	-0.95522433752639
ID1	2.66112456293706	6.90514322916666	3.58946059895164	0.00140060930516347	0.150378535403913	-0.975279408571022
LOC730167	1.37757167832168	3.59580208333333	3.56461396484413	0.00149129543243442	0.152510891265283	-1.02932686497
C9orf72	1.17760693473193	8.42763368055556	3.56370489203285	0.001494719837527	0.152510891265283	-1.03130255470999
UNQ9368	2.58478569347319	5.68368315972222	3.56199330880408	0.00150118807209899	0.152510891265283	-1.03502199965184
PNMAL2	1.03863913170163	7.05716059027778	3.5505620159211	0.00154509372302298	0.154781494579402	-1.05985182639695
LOC100129387	1.59044274475524	5.75355989583333	3.54062483427493	0.00158427653084834	0.154781494579402	-1.08141982420215
TWIST1	-1.03856672494173	3.67004340277778	-3.53998119072951	0.00158684759713293	0.154781494579402	-1.08281627621968
TRGV7	-1.38203088578088	8.90466319444444	-3.52953386919441	0.00162915333392379	0.155460103060355	-1.10547366364836
ATPAF1	1.15687427156177	4.17061371527778	3.52730545901976	0.00163831838568686	0.155460103060355	-1.11030422802836
USP32	1.30153656759906	8.02241753472222	3.52082554715628	0.00166525556356187	0.155460103060355	-1.12434631740048
LOC100128025	1.13628336247086	7.55936371527778	3.51051007258176	0.00170903005681057	0.156023312899127	-1.14668611382602
PRO0628	1.00420658508159	6.95731076388889	3.50305878871545	0.00174134542842086	0.156023312899127	-1.16281221656442
KIR3DL3	-1.18498251748252	5.93120833333333	-3.49779544195904	0.00176452983279825	0.156023312899127	-1.17419764358222
HOXA2	-1.2314087995338	3.80647743055555	-3.48358401912822	0.00182864100866598	0.156422858051968	-1.20491598501223
KCNK7	1.03489102564102	8.60254513888889	3.4831446542378	0.00183065879815744	0.156422858051968	-1.20586514006578
ARHGAP11A	1.34127738927739	3.78395138888889	3.47903419432084	0.00184964141637445	0.156904331654447	-1.21474333026354
CLEC7A	1.13409192890441	9.49317100694444	3.46582524679007	0.0019119477549866	0.158590612421813	-1.2432537596751
ZNF669	1.04021445221445	5.99936805555556	3.46151996560453	0.00193269338216224	0.159583260060703	-1.25253983575575
HIST1H2AE	-1.48401413170163	10.5279071180556	-3.44944026425588	0.00199207688614545	0.162724223356852	-1.27857725743532
CXCL6	1.11165705128205	4.86352256944445	3.43027629741994	0.00208994303697863	0.166444384531046	-1.31983139111804
ZSWIM3	-1.07014612470863	7.57254774305556	-3.42914924950143	0.00209584182833188	0.166444384531046	-1.32225551976015
LOC100128697	1.35973674242424	5.70039149305556	3.4247098246395	0.0021192348124248	0.166521827974822	-1.33180187828598
DMRTC2	1.36024635780886	3.93935503472222	3.41909027611508	0.00214921025309313	0.166633006470325	-1.34388076140191
ATF7	1.3851199009324	3.08294184027778	3.41428905685092	0.00217514646942733	0.167493492647222	-1.35419609530282
FCAR	1.16284877622378	9.44013020833333	3.40791096901592	0.00221007139700513	0.167617720816727	-1.36789270377698
PAPD5	1.23652068764569	3.94225173611111	3.37619111984596	0.00239200514167301	0.17368235428681	-1.43589562553117
ZNF540	-1.11679414335665	5.21307552083333	-3.36349643116025	0.0024688169139211	0.175362672221129	-1.463057097049
HUS1B	1.57534090909091	4.66859375	3.3536603986967	0.00252997042727946	0.17750148347465	-1.48408046217974
SGSM2	1.23620163170163	10.6288611111111	3.34455146532658	0.00258791060801101	0.179259719566138	-1.50353259834845
LOC286087	-1.1404240967366	7.45039149305556	-3.31750968561759	0.0027675893501106	0.180858010330656	-1.56118153050534
MMP8	1.63179997086247	4.62332725694444	3.30669132437791	0.00284280303657239	0.182642109697988	-1.58420247869483
LOC100128077	1.27916972610723	4.31076996527778	3.29116621914434	0.00295420374550996	0.188177953255675	-1.61719622664323
LOC100128437	-1.10314831002331	3.39592534722222	-3.29011771815649	0.0029618775433737	0.188177953255675	-1.61942264478362
LOC388780	1.21388359557109	5.56912065972222	3.27539600459491	0.0030716787984341	0.193009443620288	-1.65065827237816
FPR3	-1.04176311188812	8.55840104166667	-3.25044326013355	0.00326682798226527	0.198452342775818	-1.7034937312091
PRB3	-1.40119755244755	8.57236458333333	-3.23304453069266	0.00340992351831481	0.198452342775818	-1.74025231128552
FAM43A	-1.11546270396271	9.55417361111111	-3.2218786163151	0.00350492220173198	0.200856544156866	-1.76380661556404
IFNG	-1.1781807983683	7.12792100694444	-3.21773360088839	0.00354083295436262	0.200856544156866	-1.77254318740609
LOC100132495	1.12275713869464	4.82783246527778	3.21215180615996	0.00358975211594502	0.201237280382094	-1.7843018394502
MAFF	1.39974621212122	8.20834548611111	3.20589508122929	0.00364536057274509	0.201880598110958	-1.79747371406327
ELF3	1.10424227855478	4.22240017361111	3.20112602102261	0.0036883034080488	0.202785758530991	-1.80750757169502
FLJ31104	1.02864641608391	4.03915885416667	3.1972266403119	0.00372377693016821	0.203756325934981	-1.81570770526619
MALAT1	1.00477782634032	8.96700086805556	3.192069865552	0.00377119411773504	0.203911942933418	-1.82654655193463
RTP4	-1.13473106060607	11.4521267361111	-3.18593361206042	0.00382837541014575	0.2041086302584	-1.83943592529609
KIAA2022	1.01728554778555	3.20217361111111	3.17939825432334	0.00389019332967537	0.204318209945051	-1.85315376232784
CECR7	1.1103090034965	4.66387760416667	3.1736630360086	0.00394523316728903	0.205080393186897	-1.86518365532577
FASLG	-1.11662135780887	9.43496267361111	-3.1520240625335	0.00415972119743779	0.211319052183032	-1.91050060320329
MAML3	1.08891579254079	6.09743923611111	3.14608619069592	0.00422051114466692	0.211319052183032	-1.92291578353053
FOSB	1.78749431818182	8.5258359375	3.14245437140243	0.00425811230991957	0.21205501918632	-1.93050505534956
CASS4	1.07074898018648	7.86513107638889	3.13748927095597	0.00431003841545101	0.21205501918632	-1.94087511931361
ProSAPiP1	1.02075393356643	4.25726822916667	3.13334600891053	0.00435383463967173	0.21323534449373	-1.94952398128379
ADARB2	-1.37645352564103	6.68533767361111	-3.12797502299623	0.0044112449805563	0.214212304023957	-1.96072923965578
CR745709	-1.18269493006993	3.18068229166667	-3.12550207157262	0.00443792204669466	0.214964972945051	-1.96588600646036
EGR1	2.18831016899767	10.7192039930555	3.10182402536672	0.00470131316326514	0.216472845981897	-2.01518219329211
LHCGR	1.53197727272727	2.77240625	3.09757949012671	0.00475008721511797	0.216472845981897	-2.02400379700008
KRTAP9-9	1.39113650932401	5.10811371527778	3.09257431421287	0.00480822534277228	0.216617355670894	-2.03440025365684
OR4E2	-1.04461451048951	2.30136979166667	-3.0856429056472	0.0048898653745762	0.216617355670894	-2.04878695323043
LOC645249	-1.20798732517483	2.92249739583333	-3.08199425987008	0.00493337220836206	0.216617355670894	-2.05635494223203
SNX31	-1.22190938228438	3.06189756944444	-3.08112500405139	0.00494379188833081	0.216617355670894	-2.05815742727432
NFKBID	1.52909688228438	7.10459982638889	3.06785458408161	0.00510550492717751	0.216617355670894	-2.08565003490225
HHIP	1.14148426573427	3.84080208333333	3.06562214651314	0.00513320246474399	0.216617355670894	-2.09027041050185
LOC253044	-1.13093021561772	2.88282378472222	-3.0586032982412	0.00522122467827745	0.218176248547752	-2.10478829023738
VMO1	-1.42753511072261	7.97213628472222	-3.054365108083	0.00527507281597179	0.218176248547752	-2.11354818928114
KANK4	-1.50536378205129	3.58132378472222	-3.03983894737382	0.00546369540757262	0.223152931003573	-2.14353522165759
G0S2	2.98518210955712	12.3577274305556	3.02890208653981	0.00560994989288311	0.225464121867874	-2.16607450773591
DEFB103A	-1.07760912004662	2.68338975694445	-3.02011446152989	0.0057301675984235	0.227535405054067	-2.18416051040031
BC021857	1.03640850815851	9.34625347222222	3.01405270735252	0.0058145249526959	0.228051036564576	-2.19662376633169
LOC100133758	-1.33010576923077	4.61102604166667	-3.01337995815731	0.00582395995526548	0.228051036564576	-2.19800633497771
MGC16384	1.16067555361306	8.14831857638889	3.00768791273945	0.00590437568599034	0.22900835038048	-2.20969896910817
PTX3	1.18637893356643	8.63729427083333	3.00524957936284	0.00593914726709655	0.22907280993766	-2.21470500819125
NUDT16P	1.16398659673659	5.30828819444444	2.997561489112	0.00605006705037508	0.230057314062471	-2.2304780520564
LINGO1	-1.4647567016317	3.19192534722222	-2.9809903415853	0.00629590810655778	0.230057314062471	-2.26441824551536
EMR4P	1.3051773018648	4.48293315972222	2.97975623091693	0.00631459306398822	0.230057314062471	-2.26694272132475
LOC728073	-1.15063767482518	3.25362239583333	-2.97890300297107	0.00632754220306739	0.230057314062471	-2.26868781172816
C5orf23	1.30558187645688	4.48447048611111	2.97763098180998	0.00634689424507778	0.230057314062471	-2.27128905940177
DIRC1	-1.08552374708626	10.1558810763889	-2.97650369440438	0.00636409152168491	0.230315666588572	-2.27359393773181
C14orf49	1.12959804778555	6.05884288194444	2.97452763714814	0.00639434441892364	0.230639469371982	-2.27763333895205
CENPV	1.2372854020979	4.6787265625	2.97198505863817	0.00643347234897621	0.230639469371982	-2.2828291333745
DEFT1P2	1.01573747086247	4.49448090277778	2.96530105195032	0.00653742459956857	0.233292092705419	-2.29647897934267
FLJ44635	1.05911713286713	5.68038541666667	2.96209830020588	0.00658780045385725	0.234333082395992	-2.30301488209803
CTAG1A	1.83813155594406	4.02368489583333	2.95299231704319	0.00673305629455574	0.236405058632444	-2.32158106066418
CSRNP1	1.26744930069931	10.0143020833333	2.94872870577345	0.0068021118868513	0.23716143761595	-2.33026568210481
GREB1L	-1.05790064102564	2.82397048611111	-2.94096796336757	0.00692954315369148	0.239053561102913	-2.34605974857393
TMEM213	-1.42586494755245	3.0536015625	-2.92126251160686	0.0072633931372895	0.245396987030951	-2.38608128502222
ATP8B3	1.11307269813519	5.25484809027778	2.92092882306697	0.00726917608354547	0.245396987030951	-2.38675798759859
NEDD9	1.16516506410256	6.69142274305556	2.88975535386641	0.00782915402056342	0.253763427084795	-2.44982484879111
FAM153C	1.36803627622377	4.82423177083333	2.88398589404784	0.00793718677587804	0.256411491437687	-2.46146383152424
PER1	1.32497552447552	10.1995416666667	2.87812850657842	0.00804831222469689	0.256883122876712	-2.4732694648744
SLC5A9	1.04118342074592	4.20014670138889	2.87580170859794	0.00809286420250878	0.257660699726486	-2.47795614156887
OR4N3P	-1.04338607226108	2.51607118055556	-2.87147846699308	0.00817626457194093	0.259123337763712	-2.48665952622629
LOC441208	1.09457692307692	4.21275	2.8687099074745	0.00823010074461369	0.259123337763712	-2.49222995974677
MYOM2	-2.35727709790212	10.7725260416667	-2.85534118051894	0.00849482646614803	0.261147407169002	-2.51909375248095
LOC100129098	1.16244755244755	2.74602083333333	2.8541186852296	0.00851943274675937	0.261343618236345	-2.52154742726404
BAALC	1.14390734265734	3.43367708333333	2.84302035255139	0.00874592903518091	0.262531436676785	-2.54380078321367
C17orf107	1.0609525058275	6.89709548611111	2.83735530097191	0.00886372889962413	0.263629658507416	-2.55514436537105
TTTY7	1.84102520396271	3.04667274305556	2.83661992643355	0.00887913006358797	0.263744756901797	-2.55661609430772
RNU11	-1.37096882284383	3.12539756944444	-2.82520576471654	0.00912145155136602	0.266057181543052	-2.57943683373693
SPANXN4	-1.1518902972028	3.9100859375	-2.82374822663032	0.00915284163858398	0.26634070478078	-2.58234784643588
ITLN1	-1.0214680944056	7.2364453125	-2.82249180713616	0.00917998233515986	0.266576115066502	-2.58485661795247
EPCAM	1.11508668414918	3.21684809027778	2.81776582552356	0.00928275434106952	0.266672997149977	-2.59428858989409
MTUS2	1.27028074009324	3.41360850694444	2.81111361792525	0.00942925908439237	0.267327080981585	-2.60755226250307
RAPGEFL1	1.14794886363636	3.91173177083333	2.80725385215114	0.00951526370070969	0.267327080981585	-2.61524137040468
ARG1	1.0845402097902	11.5716145833333	2.79932339260589	0.00969430446414372	0.268654713135431	-2.63102406841284
KLK11	1.65543560606061	3.02769618055556	2.79358840835136	0.00982575705019139	0.268654713135431	-2.64242423975219
MDN1	1.01632808857809	4.68637847222222	2.78479634187168	0.0100305538794761	0.269587342340044	-2.65987967702832
PMAIP1	1.02191083916085	10.6045520833333	2.77471473524313	0.0102703451520546	0.270599495292201	-2.67986278937842
HSPB3	-1.12761815268065	4.71302690972222	-2.74474652728096	0.0110154531117292	0.275810234832749	-2.73905598758446
HIP1	1.05499941724942	7.34181597222222	2.74325998543401	0.0110537077673404	0.275810234832749	-2.74198401825892
C6orf146	1.09223528554779	2.49783767361111	2.72011960117711	0.0116655613124445	0.279098525387779	-2.78746226542119
PCOLCE2	1.41815224358974	5.32335329861111	2.71703282482737	0.0117495457408704	0.279098525387779	-2.79351428727883
SHC3	-1.19421182983683	2.98009548611111	-2.71265139266911	0.0118697312103066	0.281331080043661	-2.80209874970531
TSPAN19	1.16012062937063	2.58792708333333	2.70074108559336	0.0122023025889276	0.282642395301427	-2.82539925091903
HERV-FRD	1.24654763986014	3.0214140625	2.69534071585826	0.0123559629162356	0.282642395301427	-2.83594713137131
DKFZp434L192	-1.19595687645688	4.61157638888889	-2.67796558391767	0.0128627604360836	0.285351170411352	-2.86981112385229
EPB41	1.46189874708625	4.88363454861111	2.67093342996656	0.0130733633271698	0.287009262048281	-2.88348495589045
DDIT4L	-1.27705142773893	5.33221267361111	-2.65169491090587	0.0136661597968657	0.292060731906028	-2.92079912584466
WFDC1	1.08793356643357	3.6579375	2.65095488165835	0.0136894574143669	0.292060731906028	-2.92223166725698
ZNF608	1.13975917832168	4.0114453125	2.64141407059752	0.013993169435033	0.294978591076567	-2.94068205645853
TMEM196	1.20713068181818	2.85719010416667	2.62244719108403	0.0146157491701396	0.301828134679759	-2.97725755843413
UNQ3118	1.15150553613053	4.13913368055556	2.61692456070615	0.0148018357827734	0.301828134679759	-2.98788125695068
ARHGEF10	-1.01370061188812	7.59830989583334	-2.60794546414278	0.0151091189080767	0.303883903258076	-3.00512873347064
RGS1	1.53027199883451	9.45434809027778	2.59988144980598	0.0153901508498189	0.305293608184785	-3.02059161629608
CA6	1.1561502039627	8.11478211805556	2.59645893503955	0.01551089370223	0.30609591092097	-3.02714662461323
KIT	1.17463956876457	6.54385590277778	2.58963174845115	0.0157543931529903	0.306773969757913	-3.04020866310728
PLK3	1.12880987762237	12.9756432291667	2.57685922142774	0.0162195353159647	0.307763522575593	-3.06459590097352
CALCA	-1.12096416083916	2.834453125	-2.57201867614827	0.0163991341291163	0.308662688255801	-3.07382119093612
LOC100133690	1.31090457459207	4.97059982638889	2.56723588508993	0.0165784072120218	0.309105829059179	-3.08292717877479
GRM2	1.01070177738928	4.96178732638889	2.55951472487556	0.0168716724813732	0.30970216131137	-3.09760810265687
LOC100291104	1.12591229603729	2.52435590277778	2.55815804006981	0.0169236979777244	0.310159311014834	-3.10018519873271
CEACAM6	1.64206876456876	6.51948611111111	2.52295387386573	0.018326974366974	0.320838264691742	-3.16679462224637
KLF5	1.02992977855478	8.00521006944444	2.51710340115258	0.0185703904028804	0.321623161311435	-3.1778147115569
hCG_1776018	-1.1708159965035	2.98489322916667	-2.5131544371519	0.0187363831200132	0.322937870927612	-3.18524501109918
MPO	1.06959178321677	9.83234895833333	2.50499723390167	0.0190836311077492	0.324401264385848	-3.20057279728744
MNX1	1.01398251748252	2.84064583333333	2.486497949085	0.0198933433601732	0.327103540775124	-3.23522996904787
NCAPG2	1.40976442307692	5.81780989583333	2.48573001339561	0.0199276334447294	0.327103540775124	-3.23666550834352
LOC728114	1.10984178321678	2.318109375	2.46993695281287	0.0206450667399147	0.333392000482575	-3.2661323485048
LOC100128130	1.06897377622377	4.43151041666667	2.46736541397915	0.0207641197454503	0.333545681974906	-3.27092021440615
ACVRL1	-1.15597261072261	6.32192013888889	-2.46361927796683	0.0209386877543621	0.334255656635085	-3.27788992066601
ZNF233	1.65369216200466	4.38755295138889	2.46074864526874	0.0210733740625308	0.334715424693197	-3.2832266430893
GNG13	-1.00186625874126	8.72174479166667	-2.45882574781644	0.0211640408415693	0.334741879979489	-3.28679945834467
BEX1	1.10985999417249	6.90651128472222	2.45330770691707	0.0214262261246979	0.335997377548336	-3.29704327283979
PTGS2	1.50042278554778	10.5573975694444	2.44881135721179	0.0216420795517685	0.336504176416077	-3.30538059805595
COL17A1	1.56932488344988	5.73229340277778	2.44145924691177	0.021999353901059	0.338989591848497	-3.31899416738292
AVL9	1.12105492424242	6.46274565972222	2.43856568071329	0.0221414516183023	0.339878712358262	-3.32434555502313
DEFA4	1.27024373543124	12.2833289930556	2.41139682732682	0.0235175170164221	0.347700484291923	-3.37441138481761
FOXJ2	1.06409455128205	7.14557204861111	2.4085919143694	0.0236639753873481	0.34873868882695	-3.37956146845465
NFASC	-1.08075859557109	4.87894704861111	-2.40605714852521	0.0237970490483782	0.350023219186178	-3.38421250255221
ELANE	1.2218868006993	8.65214322916667	2.39350156646725	0.0244664099392894	0.354818118826501	-3.40720806394181
EPHA3	1.0295201048951	2.670296875	2.39223600208922	0.0245348303019153	0.354818118826501	-3.40952199616397
EGR4	1.11080594405594	3.30921875	2.38967870901533	0.0246736221158735	0.354818118826501	-3.41419548328924
PNMA6A	1.11665690559441	5.8806171875	2.38217295529955	0.0250851546219442	0.355498094253182	-3.42789518837018
BCL8	-1.08161611305361	3.84084809027778	-2.38187091934908	0.025101846022162	0.355498094253182	-3.42844593561462
MUC5AC	-1.11831555944056	7.53169270833333	-2.35706688094927	0.0265078744799026	0.360580996701794	-3.47353205666001
OR7E85P	-1.03258391608392	3.56289583333333	-2.33037420384262	0.0281012310337986	0.366382822638363	-3.52173247885962
CTTNBP2	-1.24201573426574	3.39176041666667	-2.32824810866999	0.0282318333012432	0.366382822638363	-3.52555731941681
XRRA1	1.11438082750583	4.13927256944444	2.32648187452123	0.0283407512666448	0.367049639281257	-3.52873314863101
AQP10	-1.03227768065269	9.23663368055556	-2.31334365308169	0.0291630612126256	0.370798984068569	-3.55231034515951
LOC100128300	-1.01707750582751	6.36677430555556	-2.31072435935215	0.0293295803684659	0.371349691354226	-3.55700099004536
OLFM4	1.69330798368297	9.76964409722223	2.30122422377585	0.0299408430996939	0.373986201025933	-3.57398637644154
LTF	1.14720192307693	11.8835260416667	2.28824401533768	0.0307947893426667	0.377054829681731	-3.59712374794286
EDN3	-1.22174067599068	3.30826736111111	-2.28726441596226	0.03086012673078	0.377223505129566	-3.59886659546756
IGFL3	1.00957473776224	3.14625260416667	2.27070076081636	0.0319841542295342	0.383608587067597	-3.62826515670819
BPI	1.18937747668998	8.86644878472222	2.26439663478338	0.0324216441593617	0.384413149203731	-3.63941907524714
KIF20A	1.44370163170163	4.47727777777778	2.26288593672778	0.0325272866266687	0.384413149203731	-3.64208906555349
AREG	1.99989772727272	7.51263020833333	2.2580925378388	0.0328645591830439	0.386466939657882	-3.65055343572626
ORM1	1.07703758741257	10.8021302083333	2.23473375566547	0.0345539692443836	0.393862980791829	-3.69163867651065
VCX2	-1.00350276806527	3.58502690972222	-2.23077405947681	0.0348480270791735	0.39418599176798	-3.69857637792361
TOP2A	1.17394216200466	4.48864670138889	2.19798626153774	0.0373712789268778	0.403567465352006	-3.75571976599095
MSR1	-1.29286028554779	5.85192795138889	-2.19459458653364	0.0376414866085282	0.404926859660017	-3.76159971436374
WDR93	1.06690326340326	7.93657638888889	2.19352186048141	0.0377273145302333	0.404926859660017	-3.76345821225646
CXCL14	-1.17268371212121	3.02095920138889	-2.17395178331051	0.0393243798052924	0.410313734257379	-3.79725960031479
NTRK2	1.28178015734266	2.85577864583333	2.15410886226802	0.0410055844587282	0.41517473560869	-3.83132978020272
COL15A1	1.0185016025641	2.88537586805556	2.14764410448109	0.041567099670002	0.417236533981531	-3.84238531507646
TRIM55	-1.0181300990676	2.25036892361111	-2.1408915087358	0.0421609757956077	0.421416273940286	-3.8539096325688
ABCA13	1.08314437645688	5.26192100694444	2.13855655619508	0.0423680938083071	0.421621534478453	-3.85788898640085
PDE6A	-1.0299409965035	2.8449921875	-2.13415467267875	0.0427610380796244	0.422840667080489	-3.86538308073682
ITGAD	1.17673062354312	6.26921961805556	2.08797469421634	0.0470843925566256	0.434176083516343	-3.94337990564843
RP1-21O18.1	1.03484688228438	4.50090190972222	2.0872684469454	0.0471534361426459	0.434176083516343	-3.9445638175546
